# Supplementary material
Source: PubMed Central journal article supplement (PMC11384335)
Supplement: NIHMS2015817-supplement-Supplement_Tables.pdf [file NIHMS2015817-supplement-Supplement_Tables.pdf]

| Model name | Balanced accuracy           | Weighted F1                 | ROC AUC                     |
|------------|-----------------------------|-----------------------------|-----------------------------|
| CONCH      | <b>0.913 (0.866, 0.960)</b> | <b>0.913 (0.867, 0.960)</b> | <b>0.943 (0.897, 0.979)</b> |
| PLIP       | 0.507 (0.500, 0.523)        | 0.348 (0.263, 0.438)        | 0.688 (0.600, 0.771)        |
| BiomedCLIP | 0.553 (0.510, 0.600)        | 0.465 (0.358, 0.557)        | 0.852 (0.784, 0.912)        |
| OpenAICLIP | 0.500 (0.500, 0.500)        | 0.333 (0.255, 0.418)        | 0.643 (0.544, 0.726)        |

**Supplementary Data Table 1: Zero-shot classification with prompt ensembling on BRCA subtyping** ( $n = 150$ ) in terms of balanced accuracy, weighted F1 score, and ROC AUC. Best performing model for each metric is bolded. 95% CI is included in parentheses.

| Model name | Balanced accuracy           | Weighted F1                 | ROC AUC                     |
|------------|-----------------------------|-----------------------------|-----------------------------|
| CONCH      | <b>0.902 (0.860, 0.938)</b> | <b>0.903 (0.863, 0.938)</b> | <b>0.975 (0.955, 0.992)</b> |
| PLIP       | 0.804 (0.755, 0.850)        | 0.797 (0.740, 0.850)        | 0.956 (0.932, 0.975)        |
| BiomedCLIP | 0.791 (0.737, 0.840)        | 0.789 (0.733, 0.842)        | 0.924 (0.893, 0.950)        |
| OpenAICLIP | 0.347 (0.333, 0.363)        | 0.194 (0.141, 0.252)        | 0.673 (0.626, 0.719)        |

**Supplementary Data Table 2: Zero-shot classification with prompt ensembling on RCC subtyping** ( $n = 225$ ) in terms of balanced accuracy, weighted F1 score, and ROC AUC. Best performing model for each metric is bolded. 95% CI is included in parentheses.

| Model name | Balanced accuracy           | Weighted F1                 | ROC AUC                     |
|------------|-----------------------------|-----------------------------|-----------------------------|
| CONCH      | <b>0.907 (0.859, 0.948)</b> | <b>0.907 (0.860, 0.947)</b> | <b>0.962 (0.933, 0.984)</b> |
| PLIP       | 0.787 (0.720, 0.849)        | 0.786 (0.720, 0.847)        | 0.838 (0.768, 0.899)        |
| BiomedCLIP | 0.780 (0.713, 0.843)        | 0.776 (0.704, 0.840)        | 0.877 (0.819, 0.922)        |
| OpenAICLIP | 0.553 (0.503, 0.604)        | 0.478 (0.382, 0.570)        | 0.603 (0.514, 0.689)        |

**Supplementary Data Table 3: Zero-shot classification with prompt ensembling on NSCLC subtyping** ( $n = 150$ ) in terms of balanced accuracy, weighted F1 score, and ROC AUC. Best performing model for each metric is bolded. 95% CI is included in parentheses.

| Model name | Cohen’s $\kappa$            | Balanced accuracy           | Weighted F1                 |
|------------|-----------------------------|-----------------------------|-----------------------------|
| CONCH      | <b>0.200 (0.128, 0.277)</b> | <b>0.425 (0.305, 0.516)</b> | <b>0.314 (0.236, 0.400)</b> |
| PLIP       | 0.079 (0.014, 0.142)        | 0.326 (0.250, 0.404)        | 0.198 (0.129, 0.267)        |
| BiomedCLIP | 0.009 (0.000, 0.041)        | 0.259 (0.204, 0.327)        | 0.032 (0.005, 0.071)        |
| OpenAICLIP | 0.004 (0.000, 0.021)        | 0.204 (0.200, 0.214)        | 0.045 (0.015, 0.087)        |

**Supplementary Data Table 4: Zero-shot classification with prompt ensembling on DHMC LUAD** ( $n = 143$ ) in terms of Cohen’s  $\kappa$ , balanced accuracy, and weighted F1 score. Best performing model for each metric is bolded. 95% CI is included in parentheses.

| Model name | Quadratic weighted $\kappa$ | Balanced accuracy           | Weighted F1                 |
|------------|-----------------------------|-----------------------------|-----------------------------|
| CONCH      | <b>0.690 (0.667, 0.713)</b> | <b>0.600 (0.584, 0.615)</b> | 0.398 (0.375, 0.421)        |
| PLIP       | 0.180 (0.147, 0.212)        | 0.306 (0.293, 0.320)        | 0.097 (0.085, 0.109)        |
| BiomedCLIP | 0.550 (0.517, 0.582)        | 0.484 (0.465, 0.503)        | <b>0.438 (0.415, 0.461)</b> |
| OpenAICLIP | 0.091 (0.067, 0.118)        | 0.289 (0.275, 0.302)        | 0.183 (0.167, 0.201)        |

**Supplementary Data Table 5: Zero-shot classification with prompt ensembling on SICAP** ( $n = 2,122$ ) in terms of quadratic weighted Cohen’s  $\kappa$ , balanced accuracy, and weighted F1 score. Best performing model for each metric is bolded. 95% CI is included in parentheses.

| Model name | Balanced accuracy           | Weighted F1                 | ROC AUC                     |
|------------|-----------------------------|-----------------------------|-----------------------------|
| CONCH      | <b>0.791 (0.782, 0.800)</b> | <b>0.803 (0.794, 0.813)</b> | <b>0.979 (0.977, 0.981)</b> |
| PLIP       | 0.674 (0.665, 0.683)        | 0.687 (0.676, 0.698)        | 0.944 (0.941, 0.947)        |
| BiomedCLIP | 0.553 (0.542, 0.564)        | 0.533 (0.521, 0.545)        | 0.924 (0.921, 0.928)        |
| OpenAICLIP | 0.271 (0.262, 0.280)        | 0.247 (0.236, 0.258)        | 0.781 (0.777, 0.786)        |

**Supplementary Data Table 6: Zero-shot classification with prompt ensembling on CRC100k** ( $n = 7,180$ ) in terms of balanced accuracy, weighted F1 score, and ROC AUC. Best performing model for each metric is bolded. 95% CI is included in parentheses.

| Model name | Balanced accuracy           | Weighted F1                 | ROC AUC                     |
|------------|-----------------------------|-----------------------------|-----------------------------|
| CONCH      | <b>0.719 (0.706, 0.731)</b> | <b>0.705 (0.692, 0.718)</b> | <b>0.877 (0.870, 0.885)</b> |
| PLIP       | 0.624 (0.609, 0.638)        | 0.636 (0.622, 0.650)        | 0.790 (0.780, 0.801)        |
| BiomedCLIP | 0.616 (0.603, 0.628)        | 0.575 (0.559, 0.589)        | 0.824 (0.815, 0.833)        |
| OpenAICLIP | 0.296 (0.290, 0.303)        | 0.196 (0.183, 0.209)        | 0.496 (0.484, 0.508)        |

**Supplementary Data Table 7: Zero-shot classification with prompt ensembling on WSSS4LUAD** ( $n = 4,693$ ) in terms of balanced accuracy, weighted F1 score, and ROC AUC. Best performing model for each metric is bolded. 95% CI is included in parentheses.

| Model name | Balanced accuracy           | Weighted F1                 | ROC AUC                     |
|------------|-----------------------------|-----------------------------|-----------------------------|
| CONCH      | <b>0.620 (0.600, 0.680)</b> | <b>0.570 (0.525, 0.658)</b> | <b>0.870 (0.827, 0.890)</b> |
| PLIP       | 0.530 (0.520, 0.543)        | 0.419 (0.381, 0.461)        | 0.701 (0.676, 0.720)        |
| BiomedCLIP | 0.550 (0.513, 0.600)        | 0.465 (0.383, 0.577)        | 0.726 (0.688, 0.758)        |
| OpenAICLIP | 0.500 (0.500, 0.500)        | 0.333 (0.333, 0.333)        | 0.564 (0.543, 0.579)        |

**Supplementary Data Table 8: Zero-shot classification without prompt ensembling on BRCA subtyping** ( $n = 150$ ) in terms of balanced accuracy, weighted F1 score, and ROC AUC. Best performing model for each metric is bolded. 95% CI is included in parentheses.

| Model name | Balanced accuracy           | Weighted F1                 | ROC AUC                     |
|------------|-----------------------------|-----------------------------|-----------------------------|
| CONCH      | <b>0.816 (0.791, 0.831)</b> | <b>0.816 (0.783, 0.832)</b> | <b>0.964 (0.959, 0.969)</b> |
| PLIP       | 0.749 (0.693, 0.764)        | 0.741 (0.679, 0.756)        | 0.944 (0.939, 0.947)        |
| BiomedCLIP | 0.656 (0.644, 0.682)        | 0.639 (0.624, 0.668)        | 0.900 (0.890, 0.910)        |
| OpenAICLIP | 0.333 (0.333, 0.338)        | 0.167 (0.167, 0.189)        | 0.575 (0.562, 0.589)        |

**Supplementary Data Table 9: Zero-shot classification without prompt ensembling on RCC subtyping** ( $n = 225$ ) in terms of balanced accuracy, weighted F1 score, and ROC AUC (median from 50 sets of randomly sampled prompts). Best performing model for each metric is bolded. 95% CI is included in parentheses.

| Model name | Balanced accuracy           | Weighted F1                 | ROC AUC                     |
|------------|-----------------------------|-----------------------------|-----------------------------|
| CONCH      | <b>0.780 (0.687, 0.807)</b> | <b>0.775 (0.671, 0.804)</b> | <b>0.917 (0.885, 0.941)</b> |
| PLIP       | 0.663 (0.567, 0.700)        | 0.640 (0.532, 0.700)        | 0.791 (0.763, 0.812)        |
| BiomedCLIP | 0.683 (0.620, 0.727)        | 0.670 (0.561, 0.721)        | 0.842 (0.805, 0.864)        |
| OpenAICLIP | 0.503 (0.500, 0.517)        | 0.371 (0.333, 0.396)        | 0.542 (0.513, 0.583)        |

**Supplementary Data Table 10: Zero-shot classification without prompt ensembling on NSCLC subtyping** ( $n = 150$ ) in terms of balanced accuracy, weighted F1 score, and ROC AUC (median from 50 sets of randomly sampled prompts). Best performing model for each metric is bolded. 95% CI is included in parentheses.

| Model name | Cohen’s $\kappa$            | Balanced accuracy           | Weighted F1                 |
|------------|-----------------------------|-----------------------------|-----------------------------|
| CONCH      | <b>0.111 (0.092, 0.137)</b> | <b>0.314 (0.291, 0.346)</b> | <b>0.231 (0.211, 0.258)</b> |
| PLIP       | 0.020 (0.014, 0.031)        | 0.231 (0.222, 0.246)        | 0.114 (0.069, 0.186)        |
| BiomedCLIP | 0.023 (0.014, 0.040)        | 0.253 (0.240, 0.273)        | 0.067 (0.044, 0.092)        |
| OpenAICLIP | 0.005 (0.000, 0.017)        | 0.194 (0.188, 0.205)        | 0.119 (0.053, 0.211)        |

**Supplementary Data Table 11: Zero-shot classification without prompt ensembling on DHMC LUAD** ( $n = 143$ ) in terms of Cohen’s  $\kappa$ , balanced accuracy, and weighted F1 score (median from 50 sets of randomly sampled prompts). Best performing model for each metric is bolded. 95% CI is included in parentheses.

| Model name | Quadratic weighted $\kappa$ | Balanced accuracy           | Weighted F1                 |
|------------|-----------------------------|-----------------------------|-----------------------------|
| CONCH      | 0.303 (0.248, 0.396)        | 0.339 (0.325, 0.396)        | 0.241 (0.207, 0.300)        |
| PLIP       | 0.171 (0.127, 0.243)        | 0.287 (0.268, 0.324)        | 0.226 (0.185, 0.268)        |
| BiomedCLIP | <b>0.396 (0.350, 0.433)</b> | <b>0.375 (0.351, 0.389)</b> | <b>0.352 (0.318, 0.371)</b> |
| OpenAICLIP | 0.002 (0.000, 0.022)        | 0.250 (0.250, 0.256)        | 0.140 (0.098, 0.187)        |

**Supplementary Data Table 12: Zero-shot classification without prompt ensembling on SICAP** ( $n = 2, 122$ ) in terms of quadratic weighted Cohen’s  $\kappa$ , balanced accuracy, and weighted F1 score (median from 50 sets of randomly sampled prompts). Best performing model for each metric is bolded. 95% CI is included in parentheses.

| Model name | Balanced accuracy           | Weighted F1                 | ROC AUC                     |
|------------|-----------------------------|-----------------------------|-----------------------------|
| CONCH      | <b>0.566 (0.533, 0.598)</b> | <b>0.542 (0.496, 0.589)</b> | <b>0.901 (0.893, 0.918)</b> |
| PLIP       | 0.520 (0.485, 0.540)        | 0.517 (0.484, 0.576)        | 0.879 (0.869, 0.898)        |
| BiomedCLIP | 0.422 (0.398, 0.436)        | 0.372 (0.346, 0.408)        | 0.859 (0.845, 0.868)        |
| OpenAICLIP | 0.234 (0.211, 0.250)        | 0.185 (0.149, 0.202)        | 0.727 (0.715, 0.733)        |

**Supplementary Data Table 13: Zero-shot classification without prompt ensembling on CRC100k** ( $n = 7, 180$ ) in terms of balanced accuracy, weighted F1 score, and ROC AUC (median from 50 sets of randomly sampled prompts). Best performing model for each metric is bolded. 95% CI is included in parentheses.

| Model name | Balanced accuracy           | Weighted F1                 | ROC AUC                     |
|------------|-----------------------------|-----------------------------|-----------------------------|
| CONCH      | <b>0.598 (0.560, 0.650)</b> | <b>0.590 (0.547, 0.627)</b> | <b>0.795 (0.769, 0.827)</b> |
| PLIP       | 0.462 (0.439, 0.492)        | 0.408 (0.386, 0.475)        | 0.710 (0.654, 0.760)        |
| BiomedCLIP | 0.512 (0.474, 0.550)        | 0.452 (0.408, 0.518)        | 0.747 (0.734, 0.775)        |
| OpenAICLIP | 0.333 (0.328, 0.333)        | 0.195 (0.189, 0.239)        | 0.551 (0.494, 0.608)        |

**Supplementary Data Table 14: Zero-shot classification without prompt ensembling on WSSS4LUAD** ( $n = 4, 693$ ) in terms of balanced accuracy, weighted F1 score, and ROC AUC (median from 50 sets of randomly sampled prompts). Best performing model for each metric is bolded. 95% CI is included in parentheses.

| Model name    | Balanced accuracy           | Weighted F1                 | ROC AUC                     |
|---------------|-----------------------------|-----------------------------|-----------------------------|
| CONCH         | <b>0.867 (0.811, 0.914)</b> | <b>0.865 (0.805, 0.914)</b> | <b>0.941 (0.893, 0.975)</b> |
| PLIP          | 0.787 (0.723, 0.847)        | 0.783 (0.711, 0.846)        | 0.842 (0.771, 0.906)        |
| BiomedCLIP    | 0.833 (0.781, 0.886)        | 0.829 (0.770, 0.889)        | 0.928 (0.874, 0.966)        |
| OpenAICLIP    | 0.827 (0.768, 0.888)        | 0.824 (0.762, 0.886)        | 0.903 (0.852, 0.953)        |
| ResNet50 (tr) | 0.767 (0.699, 0.834)        | 0.764 (0.692, 0.832)        | 0.822 (0.750, 0.889)        |

**Supplementary Data Table 15: Supervised classification on BRCA subtyping** ( $n = 150$ ) in terms of balanced accuracy, weighted F1 score, and ROC AUC. Best performing model for each metric is bolded. 95% CI is included in parentheses.

| Model name    | Balanced accuracy           | Weighted F1                 | ROC AUC                     |
|---------------|-----------------------------|-----------------------------|-----------------------------|
| CONCH         | <b>0.942 (0.909, 0.969)</b> | <b>0.942 (0.909, 0.969)</b> | <b>0.992 (0.981, 0.999)</b> |
| PLIP          | 0.924 (0.887, 0.956)        | 0.924 (0.884, 0.956)        | 0.989 (0.979, 0.996)        |
| BiomedCLIP    | 0.924 (0.886, 0.957)        | 0.924 (0.883, 0.956)        | 0.985 (0.969, 0.996)        |
| OpenAICLIP    | 0.893 (0.850, 0.930)        | 0.894 (0.849, 0.930)        | 0.978 (0.957, 0.992)        |
| ResNet50 (tr) | 0.916 (0.878, 0.951)        | 0.916 (0.880, 0.951)        | 0.974 (0.951, 0.990)        |

**Supplementary Data Table 16: Supervised classification on RCC subtyping** ( $n = 225$ ) in terms of balanced accuracy, weighted F1 score, and ROC AUC. Best performing model for each metric is bolded. 95% CI is included in parentheses.

| Model name    | Balanced accuracy           | Weighted F1                 | ROC AUC                     |
|---------------|-----------------------------|-----------------------------|-----------------------------|
| CONCH         | <b>0.933 (0.892, 0.970)</b> | <b>0.933 (0.893, 0.967)</b> | <b>0.983 (0.964, 0.996)</b> |
| PLIP          | 0.907 (0.856, 0.947)        | 0.907 (0.859, 0.947)        | 0.963 (0.931, 0.986)        |
| BiomedCLIP    | 0.927 (0.880, 0.967)        | 0.927 (0.880, 0.967)        | 0.978 (0.955, 0.993)        |
| OpenAICLIP    | 0.907 (0.858, 0.948)        | 0.907 (0.854, 0.947)        | 0.961 (0.930, 0.983)        |
| ResNet50 (tr) | 0.827 (0.768, 0.885)        | 0.826 (0.764, 0.881)        | 0.916 (0.869, 0.956)        |

**Supplementary Data Table 17: Supervised classification on NSCLC subtyping** ( $n = 150$ ) in terms of balanced accuracy, weighted F1 score, and ROC AUC. Best performing model for each metric is bolded. 95% CI is included in parentheses.

| Model name | Quadratic weighted kappa    | Balanced accuracy           | Weighted F1                 |
|------------|-----------------------------|-----------------------------|-----------------------------|
| CONCH      | 0.833 (0.813, 0.851)        | <b>0.711 (0.688, 0.732)</b> | 0.745 (0.726, 0.764)        |
| PLIP       | 0.762 (0.739, 0.784)        | 0.589 (0.570, 0.609)        | 0.657 (0.637, 0.678)        |
| BiomedCLIP | 0.719 (0.695, 0.740)        | 0.549 (0.528, 0.567)        | 0.628 (0.606, 0.647)        |
| OpenAICLIP | 0.704 (0.676, 0.732)        | 0.599 (0.579, 0.617)        | 0.662 (0.641, 0.682)        |
| CTransPath | <b>0.835 (0.817, 0.851)</b> | 0.678 (0.658, 0.700)        | <b>0.747 (0.728, 0.766)</b> |

**Supplementary Data Table 18: Supervised classification on SICAP** ( $n = 2,122$ ) in terms of quadratic weighted Cohen’s  $\kappa$ , balanced accuracy, and weighted F1 score. Best performing model for each metric is bolded. 95% CI is included in parentheses.

| Model name | Balanced accuracy           | Weighted F1                 | ROC AUC                     |
|------------|-----------------------------|-----------------------------|-----------------------------|
| CONCH      | <b>0.938 (0.931, 0.944)</b> | <b>0.955 (0.950, 0.960)</b> | <b>0.995 (0.994, 0.996)</b> |
| PLIP       | 0.879 (0.872, 0.888)        | 0.890 (0.884, 0.897)        | 0.989 (0.988, 0.991)        |
| BiomedCLIP | 0.898 (0.890, 0.905)        | 0.923 (0.916, 0.929)        | 0.991 (0.990, 0.992)        |
| OpenAICLIP | 0.884 (0.877, 0.891)        | 0.897 (0.890, 0.904)        | 0.992 (0.990, 0.993)        |
| CTransPath | <b>0.938 (0.932, 0.944)</b> | 0.950 (0.945, 0.955)        | 0.994 (0.993, 0.995)        |

**Supplementary Data Table 19: Supervised classification on CRC100k** ( $n = 7,180$ ) in terms of balanced accuracy, weighted F1 score, and ROC AUC. Best performing model for each metric is bolded. 95% CI is included in parentheses.

| Model name    | Balanced accuracy           | Weighted F1                 | ROC AUC                     |
|---------------|-----------------------------|-----------------------------|-----------------------------|
| CONCH         | <b>0.687 (0.646, 0.729)</b> | <b>0.717 (0.681, 0.754)</b> | <b>0.977 (0.969, 0.983)</b> |
| PLIP          | 0.580 (0.537, 0.625)        | 0.626 (0.585, 0.665)        | 0.966 (0.958, 0.973)        |
| BiomedCLIP    | 0.543 (0.498, 0.590)        | 0.559 (0.515, 0.601)        | 0.961 (0.952, 0.969)        |
| OpenAICLIP    | 0.509 (0.467, 0.555)        | 0.559 (0.515, 0.600)        | 0.947 (0.936, 0.957)        |
| CTransPath    | 0.619 (0.576, 0.667)        | 0.616 (0.577, 0.656)        | 0.970 (0.963, 0.976)        |
| KimiaNet      | 0.398 (0.354, 0.442)        | 0.446 (0.405, 0.486)        | 0.922 (0.907, 0.935)        |
| ResNet50 (tr) | 0.402 (0.357, 0.444)        | 0.381 (0.338, 0.424)        | 0.925 (0.911, 0.936)        |

**Supplementary Data Table 20: Supervised classification on EBRAINS** ( $n = 573$ ) in terms of balanced accuracy, weighted F1 score, and ROC AUC. Best performing model for each metric is bolded. 95% CI is included in parentheses.

| Model name | Balanced accuracy           | Weighted F1                 | ROC AUC                     |
|------------|-----------------------------|-----------------------------|-----------------------------|
| CONCH      | <b>0.371 (0.331, 0.409)</b> | <b>0.359 (0.320, 0.399)</b> | <b>0.941 (0.934, 0.948)</b> |
| PLIP       | 0.121 (0.088, 0.154)        | 0.087 (0.063, 0.113)        | 0.796 (0.778, 0.812)        |
| BiomedCLIP | 0.201 (0.176, 0.232)        | 0.124 (0.096, 0.152)        | 0.866 (0.851, 0.880)        |
| OpenAICLIP | 0.064 (0.054, 0.073)        | 0.029 (0.016, 0.045)        | 0.623 (0.604, 0.642)        |

**Supplementary Data Table 21: Zeroshot classification on Ebrains ( $n = 573$ )** in terms of balanced accuracy, weighted F1 score, and ROC AUC. Best performing model for each metric is bolded. 95% CI is included in parentheses.

| Model name | Recall@1                    | Recall@5                    | Recall@10                   | Mean Recall                 |
|------------|-----------------------------|-----------------------------|-----------------------------|-----------------------------|
| CONCH      | <b>0.400 (0.362, 0.435)</b> | <b>0.776 (0.748, 0.803)</b> | <b>0.888 (0.865, 0.910)</b> | <b>0.688 (0.665, 0.710)</b> |
| PLIP       | 0.056 (0.042, 0.072)        | 0.198 (0.170, 0.226)        | 0.307 (0.276, 0.341)        | 0.187 (0.165, 0.210)        |
| BiomedCLIP | 0.161 (0.137, 0.189)        | 0.405 (0.368, 0.441)        | 0.553 (0.517, 0.591)        | 0.373 (0.346, 0.402)        |
| OpenAICLIP | 0.018 (0.009, 0.027)        | 0.046 (0.032, 0.061)        | 0.084 (0.065, 0.103)        | 0.049 (0.038, 0.062)        |

**Supplementary Data Table 22: Zero-shot text-to-image retrieval performance for Source A ( $n = 797$ )** in terms of Recall@ $K$  for  $K \in \{1, 5, 10\}$  and mean recall over  $K$ . Best performing model for each metric is bolded. 95% CI is included in parentheses.

| Model name | Recall@1                    | Recall@5                    | Recall@10                   | Mean Recall                 |
|------------|-----------------------------|-----------------------------|-----------------------------|-----------------------------|
| CONCH      | <b>0.402 (0.369, 0.433)</b> | <b>0.792 (0.764, 0.818)</b> | <b>0.883 (0.859, 0.905)</b> | <b>0.692 (0.670, 0.714)</b> |
| PLIP       | 0.065 (0.049, 0.082)        | 0.222 (0.192, 0.251)        | 0.320 (0.287, 0.351)        | 0.202 (0.179, 0.225)        |
| BiomedCLIP | 0.171 (0.146, 0.197)        | 0.439 (0.403, 0.472)        | 0.582 (0.547, 0.615)        | 0.397 (0.373, 0.423)        |
| OpenAICLIP | 0.010 (0.004, 0.018)        | 0.049 (0.035, 0.064)        | 0.073 (0.055, 0.092)        | 0.044 (0.033, 0.056)        |

**Supplementary Data Table 23: Zero-shot image-to-text retrieval performance for Source A ( $n = 797$ )** in terms of Recall@ $K$  for  $K \in \{1, 5, 10\}$  and mean recall over  $K$ . Best performing model for each metric is bolded. 95% CI is included in parentheses.

| Model name | Recall@1                    | Recall@5                    | Recall@10                   | Mean Recall                 |
|------------|-----------------------------|-----------------------------|-----------------------------|-----------------------------|
| CONCH      | <b>0.171 (0.151, 0.188)</b> | <b>0.437 (0.412, 0.462)</b> | <b>0.562 (0.539, 0.587)</b> | <b>0.390 (0.372, 0.409)</b> |
| PLIP       | 0.020 (0.013, 0.027)        | 0.075 (0.063, 0.089)        | 0.132 (0.116, 0.148)        | 0.076 (0.066, 0.086)        |
| BiomedCLIP | 0.100 (0.086, 0.115)        | 0.264 (0.242, 0.284)        | 0.353 (0.328, 0.375)        | 0.239 (0.221, 0.256)        |
| OpenAICLIP | 0.009 (0.005, 0.014)        | 0.036 (0.027, 0.044)        | 0.052 (0.042, 0.063)        | 0.032 (0.026, 0.040)        |

**Supplementary Data Table 24: Zero-shot text-to-image retrieval performance for Source B ( $n = 1,755$ )** in terms of Recall@ $K$  for  $K \in \{1, 5, 10\}$  and mean recall over  $K$ . Best performing model for each metric is bolded. 95% CI is included in parentheses.

| Model name | Recall@1                    | Recall@5                    | Recall@10                   | Mean Recall                 |
|------------|-----------------------------|-----------------------------|-----------------------------|-----------------------------|
| CONCH      | <b>0.164 (0.146, 0.181)</b> | <b>0.403 (0.379, 0.426)</b> | <b>0.530 (0.508, 0.553)</b> | <b>0.366 (0.347, 0.384)</b> |
| PLIP       | 0.024 (0.017, 0.031)        | 0.077 (0.065, 0.090)        | 0.124 (0.110, 0.140)        | 0.075 (0.065, 0.085)        |
| BiomedCLIP | 0.099 (0.085, 0.113)        | 0.251 (0.233, 0.272)        | 0.359 (0.336, 0.380)        | 0.236 (0.220, 0.252)        |
| OpenAICLIP | 0.005 (0.002, 0.008)        | 0.027 (0.019, 0.035)        | 0.043 (0.034, 0.053)        | 0.025 (0.019, 0.031)        |

**Supplementary Data Table 25: Zero-shot image-to-text retrieval performance for Source B ( $n = 1,755$ )** in terms of Recall@ $K$  for  $K \in \{1, 5, 10\}$  and mean recall over  $K$ . Best performing model for each metric is bolded. 95% CI is included in parentheses.

| Model name | Recall@1                    | Recall@5                    | Recall@10                   | Mean Recall                 |
|------------|-----------------------------|-----------------------------|-----------------------------|-----------------------------|
| CONCH      | <b>0.087 (0.047, 0.133)</b> | <b>0.247 (0.180, 0.313)</b> | <b>0.387 (0.313, 0.460)</b> | <b>0.240 (0.189, 0.293)</b> |
| PLIP       | 0.027 (0.007, 0.053)        | 0.080 (0.040, 0.127)        | 0.180 (0.120, 0.247)        | 0.096 (0.060, 0.136)        |
| BiomedCLIP | 0.053 (0.020, 0.093)        | 0.193 (0.133, 0.267)        | 0.313 (0.240, 0.387)        | 0.187 (0.140, 0.240)        |
| OpenAICLIP | 0.020 (0.000, 0.047)        | 0.060 (0.027, 0.100)        | 0.107 (0.060, 0.160)        | 0.062 (0.033, 0.098)        |

**Supplementary Data Table 26: Zero-shot text-to-image retrieval performance for TCGA LUAD ( $n = 165$ )** in terms of Recall@ $K$  for  $K \in \{1, 5, 10\}$  and mean recall over  $K$ . Best performing model for each metric is bolded. 95% CI is included in parentheses.

| Model name | Recall@1                    | Recall@5                    | Recall@10                   | Mean Recall                 |
|------------|-----------------------------|-----------------------------|-----------------------------|-----------------------------|
| CONCH      | <b>0.067 (0.030, 0.103)</b> | <b>0.188 (0.133, 0.248)</b> | <b>0.291 (0.224, 0.364)</b> | <b>0.182 (0.135, 0.230)</b> |
| PLIP       | 0.018 (0.000, 0.042)        | 0.079 (0.042, 0.121)        | 0.115 (0.067, 0.164)        | 0.071 (0.040, 0.101)        |
| BiomedCLIP | 0.048 (0.018, 0.085)        | 0.158 (0.103, 0.212)        | 0.291 (0.224, 0.364)        | 0.166 (0.125, 0.210)        |
| OpenAICLIP | 0.006 (0.000, 0.018)        | 0.042 (0.012, 0.079)        | 0.097 (0.055, 0.139)        | 0.048 (0.026, 0.075)        |

**Supplementary Data Table 27: Zero-shot image-to-text retrieval performance for TCGA LUAD ( $n = 165$ )** in terms of Recall@ $K$  for  $K \in \{1, 5, 10\}$  and mean recall over  $K$ . Best performing model for each metric is bolded. 95% CI is included in parentheses.

| Model name | Dice score                  | Precision                   | Recall                      |
|------------|-----------------------------|-----------------------------|-----------------------------|
| CONCH      | <b>0.601 (0.530, 0.675)</b> | <b>0.672 (0.630, 0.722)</b> | <b>0.751 (0.696, 0.803)</b> |
| PLIP       | 0.549 (0.496, 0.605)        | 0.605 (0.556, 0.656)        | 0.644 (0.595, 0.694)        |
| BiomedCLIP | 0.484 (0.452, 0.520)        | 0.536 (0.505, 0.569)        | 0.557 (0.519, 0.598)        |
| OpenAICLIP | 0.367 (0.314, 0.426)        | 0.599 (0.573, 0.629)        | 0.605 (0.571, 0.639)        |

**Supplementary Data Table 28: Zero-shot segmentation performance on SICAP ( $n = 31$ )** in terms of the macro-averaged Dice score as well as precision and recall. Best performing model for each metric is bolded. 95% CI is included in parentheses.

| Model Name | Dice                        | Precision                   | Recall                      |
|------------|-----------------------------|-----------------------------|-----------------------------|
| CONCH      | <b>0.615 (0.597, 0.633)</b> | <b>0.663 (0.650, 0.675)</b> | <b>0.709 (0.693, 0.726)</b> |
| PLIP       | 0.426 (0.411, 0.443)        | 0.526 (0.513, 0.537)        | 0.541 (0.528, 0.554)        |
| BiomedCLIP | 0.446 (0.430, 0.462)        | 0.581 (0.569, 0.592)        | 0.601 (0.588, 0.615)        |
| OpenAICLIP | 0.367 (0.351, 0.381)        | 0.492 (0.481, 0.503)        | 0.511 (0.498, 0.524)        |

**Supplementary Data Table 29: Zero-shot segmentation performance on DigestPath ( $n = 250$ )** in terms of the macro-averaged Dice score as well as precision and recall. Best performing model for each metric is bolded. 95% CI is included in parentheses.

| Model name | METEOR                      | ROUGE                       |
|------------|-----------------------------|-----------------------------|
| CONCH      | <b>0.195 (0.182, 0.211)</b> | <b>0.214 (0.199, 0.230)</b> |
| GIT-base   | 0.122 (0.115, 0.130)        | 0.135 (0.125, 0.145)        |
| GIT-large  | 0.125 (0.117, 0.134)        | 0.153 (0.143, 0.163)        |

**Supplementary Data Table 30: Captioning performance with fine-tuning on Source A** (train  $n = 558$ , validation  $n = 77$ , test  $n = 162$ ) in terms of METEOR and ROUGE. Best performing model for each metric is bolded. 95% CI is included in parentheses.

| Model name           | Quadratic weighted kappa    | Balanced accuracy           | Weighted F1                 |
|----------------------|-----------------------------|-----------------------------|-----------------------------|
| 100% Training Labels |                             |                             |                             |
| CONCH                | <b>0.872 (0.868, 0.876)</b> | <b>0.739 (0.732, 0.746)</b> | <b>0.831 (0.826, 0.835)</b> |
| CTransPath           | 0.813 (0.807, 0.818)        | 0.690 (0.683, 0.697)        | 0.786 (0.781, 0.791)        |
| ResNet50             | 0.806 (0.800, 0.812)        | 0.679 (0.673, 0.686)        | 0.776 (0.772, 0.781)        |
| ViT-B/16             | 0.820 (0.815, 0.826)        | 0.676 (0.669, 0.682)        | 0.781 (0.776, 0.786)        |
| ViT-L/16             | 0.823 (0.818, 0.828)        | 0.667 (0.660, 0.673)        | 0.782 (0.777, 0.787)        |
| KimiaNet             | 0.826 (0.820, 0.832)        | 0.711 (0.704, 0.718)        | 0.800 (0.795, 0.805)        |
| 10% Training Labels  |                             |                             |                             |
| CONCH                | <b>0.826 (0.821, 0.831)</b> | <b>0.679 (0.674, 0.685)</b> | <b>0.778 (0.773, 0.782)</b> |
| CTransPath           | 0.722 (0.715, 0.729)        | 0.625 (0.620, 0.632)        | 0.707 (0.702, 0.713)        |
| ResNet50             | 0.673 (0.664, 0.682)        | 0.653 (0.645, 0.659)        | 0.682 (0.676, 0.688)        |
| ViT-B/16             | 0.758 (0.751, 0.764)        | 0.641 (0.634, 0.647)        | 0.727 (0.722, 0.732)        |
| ViT-L/16             | 0.768 (0.762, 0.775)        | 0.656 (0.650, 0.663)        | 0.736 (0.731, 0.741)        |
| KimiaNet             | 0.730 (0.723, 0.737)        | 0.620 (0.614, 0.626)        | 0.711 (0.706, 0.717)        |
| 1% Training Labels   |                             |                             |                             |
| CONCH                | <b>0.662 (0.654, 0.669)</b> | <b>0.441 (0.439, 0.443)</b> | <b>0.557 (0.551, 0.564)</b> |
| CTransPath           | 0.595 (0.587, 0.604)        | 0.433 (0.430, 0.435)        | 0.522 (0.515, 0.529)        |
| ResNet50             | 0.516 (0.506, 0.525)        | 0.414 (0.409, 0.419)        | 0.493 (0.487, 0.500)        |
| ViT-B/16             | 0.571 (0.562, 0.579)        | 0.423 (0.420, 0.427)        | 0.531 (0.525, 0.538)        |
| ViT-L/16             | 0.533 (0.524, 0.542)        | 0.404 (0.401, 0.407)        | 0.513 (0.506, 0.520)        |
| KimiaNet             | 0.396 (0.387, 0.405)        | 0.383 (0.378, 0.388)        | 0.463 (0.456, 0.469)        |

**Supplementary Data Table 31: End-to-end finetuned classification result on Gleason grading (AGGC + PANDA + SICAP) ( $n = 29,039$ ) in terms of quadratic weighted Cohen’s  $\kappa$ , balanced accuracy, and weighted F1 score. Best performing model for each metric is bolded. 95% CI is included in parentheses.**

| Hyperparameter            | Value        |
|---------------------------|--------------|
| Automatic mixed precision | fp16         |
| Batch size                | 384          |
| Gradient accumulation     | 4            |
| Weight decay              | 0.2          |
| AdamW $\beta$             | (0.9, 0.999) |
| Temperature               | Learned      |
| Peak learning rate        | 1e-4         |
| Learning rate schedule    | Cosine       |
| Warmup steps              | 250          |
| Epochs                    | 40           |

**Supplementary Data Table 32: Hyperparameters used in visual-language pretraining.**  $8 \times 80$ GB NVIDIA A100 GPUs were used for training. Effective batch size used for optimization is batch size  $\times$  gradient accumulation steps. The maximum sequence length for captions is set to 128.

| Hyperparameter                    | Value        |
|-----------------------------------|--------------|
| Layers                            | 12           |
| Heads                             | 12           |
| Patch size                        | 16           |
| Head activation                   | GELU         |
| Embedding dimension               | 768          |
| Drop path rate                    | 0.1          |
| Global crop scale                 | 0.32, 1.0    |
| Global crop number                | 2            |
| Local crop scale                  | 0.05, 0.32   |
| Local crop number                 | 10           |
| Partial prediction shape          | Block        |
| Partial prediction ratio          | 0.3          |
| Partial prediction variance       | 0.2          |
| Gradient clipping max norm        | 0.3          |
| Normalize last layer              | ✓            |
| Shared head                       | ✓            |
| AdamW $\beta$                     | (0.9, 0.999) |
| Batch size                        | 1024         |
| Freeze last layer epochs          | 3            |
| Warmup epochs                     | 10           |
| Warmup teacher temperature epochs | 30           |
| Max epochs                        | 80           |
| Learning rate schedule            | Cosine       |
| Learning rate (start)             | 0            |
| Learning rate (post warmup)       | 2e-3         |
| Learning rate (final)             | 2e-6         |
| Teacher temperature (start)       | 0.04         |
| Teacher temperature (final)       | 0.4          |
| Teacher momentum (start)          | 0.996        |
| Teacher momentum (final)          | 1.000        |
| Weight decay (start)              | 0.04         |
| Weight decay (end)                | 0.4          |
| Automatic mixed precision         | fp16         |

**Supplementary Data Table 33: Hyperparameters used in pretraining the vision model.**  $4 \times 80\text{GB}$  NVIDIA A100 GPUs were used for training. Batch size refers to the total batch size across GPUs.



| Hyperparameter            | Value        |
|---------------------------|--------------|
| Layers                    | 24           |
| Heads                     | 12           |
| Embedding dimension       | 768          |
| Hidden dimension          | 3,072        |
| Max. sequence length      | 512          |
| Pos. embedding            | Absolute     |
| Vocabulary size           | 32,000       |
| Automatic mixed precision | fp16         |
| Batch size                | 64           |
| Gradient accumulation     | 8            |
| Weight decay              | 0.01         |
| AdamW $\beta$             | (0.9, 0.999) |
| Peak learning rate        | 1e-3         |
| Learning rate schedule    | Linear       |
| Warmup steps              | 500          |
| Training steps            | 15,000       |

**Supplementary Data Table 34: Hyperparameters used in pretraining the language model.** In-house pathology reports were first de-identified using regex pattern matching before tokenization.  $4 \times 80\text{GB}$  NVIDIA A100 GPUs were used for training. Batch size refers to the total batch size across GPUs. Effective batch size used for optimization is batch size  $\times$  gradient accumulation steps. The sequence length of training examples was set to the maximum sequence length supported by the model (*i.e.* 512).

CLASSNAME.  
 a photomicrograph showing CLASSNAME.  
 a photomicrograph of CLASSNAME.  
 an image of CLASSNAME.  
 an image showing CLASSNAME.  
 an example of CLASSNAME.  
 CLASSNAME is shown.  
 this is CLASSNAME.  
 there is CLASSNAME.  
 a histopathological image showing CLASSNAME.  
 a histopathological image of CLASSNAME.  
 a histopathological photograph of CLASSNAME.  
 a histopathological photograph showing CLASSNAME.  
 shows CLASSNAME.  
 presence of CLASSNAME.  
 CLASSNAME is present.  
 an H&E stained image of CLASSNAME.  
 an H&E stained image showing CLASSNAME.  
 an H&E image showing CLASSNAME.  
 an H&E image of CLASSNAME.  
 CLASSNAME, H&E stain.  
 CLASSNAME, H&E.

**Supplementary Data Table 35: Prompt templates** used for all tasks involving prompts. The name of the class replaces CLASSNAME. See **Tables 38-44** for class prompts of each task.

| Hyperparameter         | Value        |
|------------------------|--------------|
| Batch size             | 1            |
| Weight decay           | 1e-5         |
| AdamW $\beta$          | (0.9, 0.999) |
| Peak learning rate     | 1e-4         |
| Learning rate schedule | Cosine       |
| Epochs                 | 20           |

**Supplementary Data Table 36: Hyperparameters used in slide-level weakly-supervised classification.** A single 24GB NVIDIA GeForce RTX 3090 GPU was used for each ABMIL model using weakly-supervised learning and slide-level labels. Note for EBRAINS, given the availability of a validation set, we use the validation loss to select the optimal model and perform early stopping with a patience of 10 epochs and train for up to 40 epochs (all other hyperparameters are unchanged).

| Hyperparameter          | Value        |
|-------------------------|--------------|
| Batch size              | 16           |
| Weight decay            | 0.2          |
| AdamW $\beta$           | (0.9, 0.999) |
| Learning rate           | 1e-4         |
| Warmup steps            | 10           |
| Early stopping patience | 10           |
| Epochs                  | 40           |

**Supplementary Data Table 37: Hyperparameters used in caption fine-tuning.** A single 24GB NVIDIA GeForce RTX 3090 GPU was used for training. The maximum sequence length for captions is set to 128. Top- $K$  sampling with  $K = 50$  was used as decoding strategy at generation time.

| Task       | Class | Class names                                                                                                                                                                    |
|------------|-------|--------------------------------------------------------------------------------------------------------------------------------------------------------------------------------|
| TCGA BRCA  | IDC   | invasive ductal carcinoma<br>breast invasive ductal carcinoma<br>invasive ductal carcinoma of the breast<br>invasive carcinoma of the breast, ductal pattern<br>breast IDC     |
|            | ILC   | invasive lobular carcinoma<br>breast invasive lobular carcinoma<br>invasive lobular carcinoma of the breast<br>invasive carcinoma of the breast, lobular pattern<br>breast ILC |
| TCGA NSCLC | LUAD  | adenocarcinoma<br>lung adenocarcinoma<br>adenocarcinoma of the lung<br>LUAD                                                                                                    |
|            | LUSC  | squamous cell carcinoma<br>lung squamous cell carcinoma<br>squamous cell carcinoma of the lung<br>LUSC                                                                         |
| TCGA RCC   | CCRCC | clear cell renal cell carcinoma<br>renal cell carcinoma, clear cell type<br>renal cell carcinoma of the clear cell type<br>clear cell RCC                                      |
|            | PRCC  | papillary renal cell carcinoma<br>renal cell carcinoma, papillary type<br>renal cell carcinoma of the papillary type<br>papillary RCC                                          |
|            | CHRCC | chromophobe renal cell carcinoma<br>renal cell carcinoma, chromophobe type<br>renal cell carcinoma of the chromophobe type<br>chromophobe RCC                                  |

**Supplementary Data Table 38: Class prompts for BRCA, NSCLC, and RCC subtyping.**

| Task         | Class          | Class names                                                                                                                                                                                                                                                                                                       |
|--------------|----------------|-------------------------------------------------------------------------------------------------------------------------------------------------------------------------------------------------------------------------------------------------------------------------------------------------------------------|
| DHMC<br>LUAD | papillary      | <p>papillary pattern adenocarcinoma<br/> papillary pattern adenocarcinoma of the lung<br/> lung adenocarcinoma, papillary growth pattern<br/> lung adenocarcinoma with a predominantly papillary growth pattern<br/> lung adenocarcinoma, papillary predominant histological subtype</p>                          |
|              | solid          | <p>solid pattern adenocarcinoma<br/> solid pattern adenocarcinoma of the lung<br/> lung adenocarcinoma, solid growth pattern<br/> lung adenocarcinoma with a predominantly solid growth pattern<br/> lung adenocarcinoma, solid predominant histological subtype</p>                                              |
|              | micropapillary | <p>micropapillary pattern adenocarcinoma<br/> micropapillary pattern adenocarcinoma of the lung<br/> lung adenocarcinoma, micropapillary growth pattern<br/> lung adenocarcinoma with a predominantly micropapillary growth pattern<br/> lung adenocarcinoma, micropapillary predominant histological subtype</p> |
|              | acinar         | <p>acinar pattern adenocarcinoma<br/> acinar pattern adenocarcinoma of the lung<br/> lung adenocarcinoma, acinar growth pattern<br/> lung adenocarcinoma with a predominantly acinar growth pattern<br/> lung adenocarcinoma, acinar predominant histological subtype</p>                                         |
|              | leipidic       | <p>leipidic pattern adenocarcinoma<br/> leipidic pattern adenocarcinoma of the lung<br/> lung adenocarcinoma, leipidic growth pattern<br/> lung adenocarcinoma with a predominantly leipidic growth pattern<br/> lung adenocarcinoma, leipidic predominant histological subtype</p>                               |

Supplementary Data Table 39: Class prompts for DHMC LUAD pattern classification.

| Task    | Class                                                                                                                | Class names                                                                                      |
|---------|----------------------------------------------------------------------------------------------------------------------|--------------------------------------------------------------------------------------------------|
| CRC100k | ADI                                                                                                                  | adipose<br>adipose tissue<br>adipocytes<br>fat<br>fat cells                                      |
|         | BACK                                                                                                                 | background<br>penmarking<br>empty space<br>background artifacts                                  |
|         | DEB                                                                                                                  | debris<br>colorectal adenocarcinoma debris and necrosis<br>necrosis<br>necrotic debris           |
|         | LYM                                                                                                                  | lymphocytes<br>lymphoid aggregate<br>immune cells<br>lymphoid infiltrate<br>inflammatory cells   |
|         | MUC                                                                                                                  | mucus<br>mucin<br>mucus pool<br>mucin pool                                                       |
|         | MUS                                                                                                                  | smooth muscle<br>smooth muscle tissue<br>muscle<br>muscularis propria<br>muscularis mucosa       |
|         | NORM                                                                                                                 | normal colon mucosa<br>uninvolved colon mucosa<br>benign colon mucosa<br>benign epithelium       |
|         | STR                                                                                                                  | cancer-associated stroma<br>tumor-associated stroma<br>stromal cells<br>stromal tissue<br>stroma |
| TUM     | colorectal adenocarcinoma epithelium<br>colorectal adenocarcinoma<br>tumor<br>adenocarcinoma<br>malignant epithelium |                                                                                                  |

**Supplementary Data Table 40: Class prompts for CRC100k.** The Class column refers to the original class names used in the CRC100k dataset.

| Task       | Class     | Class names                                                                                                                                                                                                                |
|------------|-----------|----------------------------------------------------------------------------------------------------------------------------------------------------------------------------------------------------------------------------|
| WSSS4LUAD  | normal    | non-tumor<br>normal tissue<br>non-cancerous tissue                                                                                                                                                                         |
|            | stroma    | tumor-associated stroma<br>cancer-associated stroma<br>tumor-associated stromal tissue<br>cancer-associated stromal tissue                                                                                                 |
|            | tumor     | tumor tissue<br>tumor epithelial tissue<br>cancerous tissue                                                                                                                                                                |
| SICAP      | NC        | non-cancerous tissue<br>non-cancerous prostate tissue<br>benign tissue<br>benign glands<br>benign prostate tissue<br>benign prostate glands                                                                                |
|            | G3        | gleason grade 3<br>gleason pattern 3<br>prostate cancer, gleason grade 3<br>prostate cancer, gleason pattern 3<br>prostate adenocarcinoma, well-differentiated<br>well-differentiated prostatic adenocarcinoma             |
|            | G4        | gleason grade 4<br>gleason pattern 4<br>prostate cancer, gleason grade 4<br>prostate cancer, gleason pattern 4<br>prostate adenocarcinoma, moderately differentiated<br>moderately differentiated prostatic adenocarcinoma |
|            | G5        | gleason grade 5<br>gleason pattern 5<br>prostate cancer, gleason grade 5<br>prostate cancer, gleason pattern 5<br>prostate adenocarcinoma, poorly differentiated<br>poorly differentiated prostatic adenocarcinoma         |
|            | Tumor     | prostatic adenocarcinoma<br>adenocarcinoma<br>prostate cancer<br>tumor tissue<br>cancerous tissue                                                                                                                          |
| DigestPath | Benign    | benign tissue<br>benign colon tissue<br>benign colorectal tissue<br>benign rectal tissue                                                                                                                                   |
|            | Malignant | malignant tissue<br>malignant colon tissue<br>malignant colorectal tissue<br>malignant rectal tissue                                                                                                                       |

**Supplementary Data Table 41: Class prompts for WSSS4LUAD, SICAP, and DigestPath.** SICAP ROI-level classification uses the prompts for NC through G5. SICAP slide-level tumor segmentation uses prompts for NC and Tumor.

| Class                                                      | Class names                                                                                                                                                                                              |
|------------------------------------------------------------|----------------------------------------------------------------------------------------------------------------------------------------------------------------------------------------------------------|
| Glioblastoma, IDH-wildtype                                 | glioblastoma, IDH-wildtype<br>glioblastoma without IDH mutation<br>glioblastoma with retained IDH<br>glioblastoma, IDH retained                                                                          |
| Transitional meningioma                                    | transitional meningioma<br>meningioma, transitional type<br>meningioma of transitional type<br>meningioma, transitional                                                                                  |
| Anaplastic meningioma                                      | anaplastic meningioma<br>meningioma, anaplastic type<br>meningioma of anaplastic type<br>meningioma, anaplastic                                                                                          |
| Pituitary adenoma                                          | pituitary adenoma<br>adenoma of the pituitary gland<br>pituitary gland adenoma<br>pituitary neuroendocrine tumor<br>neuroendocrine tumor of the pituitary<br>neuroendocrine tumor of the pituitary gland |
| Oligodendroglioma, IDH-mutant and 1p/19q codeleted         | oligodendroglioma, IDH-mutant and 1p/19q codeleted<br>oligodendroglioma<br>oligodendroglioma with IDH mutation and 1p/19q codeletion                                                                     |
| Haemangioma                                                | hemangioma<br>haemangioma of the CNS<br>hemangioma of the CNS<br>haemangioma of the central nervous system<br>hemangioma of the central nervous system                                                   |
| Ganglioglioma                                              | gangliocytoma<br>glioneuronal tumor<br>circumscribed glioneuronal tumor                                                                                                                                  |
| Schwannoma                                                 | schwannoma<br>Antoni A<br>Antoni B<br>neurilemoma                                                                                                                                                        |
| Anaplastic oligodendroglioma, IDH-mutant, 1p/19q codeleted | anaplastic oligodendroglioma, IDH-mutant and 1p/19q codeleted<br>anaplastic oligodendroglioma<br>anaplastic oligodendroglioma with IDH mutation and 1p/19q codeletion                                    |
| Anaplastic astrocytoma, IDH-wildtype                       | anaplastic astrocytoma, IDH-wildtype<br>anaplastic astrocytoma without IDH mutation<br>anaplastic astrocytoma, IDH retained<br>anaplastic astrocytoma with retained IDH                                  |

**Supplementary Data Table 42: Class prompts for EBRAINS subtyping.**

| Class                              | Class names                                                                                                                                                         |
|------------------------------------|---------------------------------------------------------------------------------------------------------------------------------------------------------------------|
| Pilocytic astrocytoma              | pilocytic astrocytoma<br>juvenile pilocytic astrocytoma<br>spongioblastoma<br>pilomyxoid astrocytoma                                                                |
| Angiomatous meningioma             | angiomatous meningioma<br>meningioma, angiomatous type<br>meningioma of angiomatous type<br>meningioma, angiomatous                                                 |
| Haemangioblastoma                  | haemangioblastoma<br>capillary hemangioblastoma<br>lindau tumor<br>angioblastoma                                                                                    |
| Gliosarcoma                        | gliosarcoma<br>gliosarcoma variant of glioblastoma                                                                                                                  |
| Adamantinomatous craniopharyngioma | adamantinomatous craniopharyngioma<br>craniopharyngioma                                                                                                             |
| Anaplastic astrocytoma, IDH-mutant | anaplastic astrocytoma, IDH-mutant<br>anaplastic astrocytoma with IDH mutation<br>anaplastic astrocytoma with mutant IDH<br>anaplastic astrocytoma with mutated IDH |
| Ependymoma                         | ependymoma<br>subependymoma<br>myxopapillary ependymoma                                                                                                             |
| Anaplastic ependymoma              | anaplastic ependymoma<br>ependymoma, anaplastic<br>ependymoma, anaplastic type                                                                                      |
| Glioblastoma, IDH-mutant           | glioblastoma, IDH-mutant<br>glioblastoma with IDH mutation<br>glioblastoma with mutant IDH<br>glioblastoma with mutated IDH                                         |
| Atypical meningioma                | atypical meningioma<br>meningioma, atypical type<br>meningioma of atypical type<br>meningioma, atypical                                                             |

**Supplementary Data Table 43: Class prompts for EBRAINS subtyping.** Continued.



| Class                                    | Class names                                                                                                                                                          |
|------------------------------------------|----------------------------------------------------------------------------------------------------------------------------------------------------------------------|
| Metastatic tumours                       | metastatic tumors<br>metastases to the brain<br>metastatic tumors to the brain<br>brain metastases<br>brain metastatic tumors                                        |
| Meningothelial meningioma                | meningothelial meningioma<br>meningioma, meningothelial type<br>meningioma of meningothelial type<br>meningioma, meningothelial                                      |
| Langerhans cell histiocytosis            | langerhans cell histiocytosis<br>histiocytosis X<br>eosinophilic granuloma<br>Hand-Schüller-Christian disease<br>Hashimoto-Pritzker disease<br>Letterer-Siwe disease |
| Diffuse large B-cell lymphoma of the CNS | diffuse large B-cell lymphoma of the CNS<br>DLBCL<br>DLBCL of the CNS<br>DLBCL of the central nervous system                                                         |
| Diffuse astrocytoma, IDH-mutant          | diffuse astrocytoma, IDH-mutant<br>diffuse astrocytoma with IDH mutation<br>diffuse astrocytoma with mutant IDH<br>diffuse astrocytoma with mutated IDH              |
| Secretory meningioma                     | secretory meningioma<br>meningioma, secretory type<br>meningioma of secretory type<br>meningioma, secretory                                                          |
| Haemangiopericytoma                      | haemangiopericytoma<br>solitary fibrous tumor<br>hemangiopericytoma<br>angioblastic meningioma                                                                       |
| Fibrous meningioma                       | fibrous meningioma<br>meningioma, fibrous type<br>meningioma of fibrous type<br>meningioma, fibrous                                                                  |
| Lipoma                                   | lipoma<br>CNS lipoma<br>lipoma of the CNS<br>lipoma of the central nervous system                                                                                    |
| Medulloblastoma, non-WNT/non-SHH         | medulloblastoma, non-WNT/non-SHH<br>medulloblastoma<br>medulloblastoma group 3<br>medulloblastoma group 4                                                            |

**Supplementary Data Table 44: Class prompts for EBRAINS subtyping.** Continued.
